# Supplementary material for: Understanding the Role of the Master Regulator XYR1 in Trichoderma reesei by Global Transcriptional Analysis
Source: Front Microbiol. 2016 Feb 16;7:175. doi: 10.3389/fmicb.2016.00175 (PMC4754417; doi:10.3389/fmicb.2016.00175)
Supplement: Table S11 — Direct regulation by XYR1 in inducing conditions. [file Table11.XLSX]

## Sheet: Table 11
Table S11 Direct regulation by XYR1 on inducing conditions.
Cellulose
Protein ID	Description	Log2 Fold Change	p-valor
102680	unique protein	1.70396	0.0010426
104180	Ankyrin	2.37882	6.02532e-09
104211	FKBP-type peptidyl-prolyl cis-trans isomerase	-1.31227	0.000299482
105808	Peptidase M, neutral zinc metallopeptidases, zinc-binding site	2.20169	0.000244216
107068	Suppressor of meioticSilencing	1.33829	0.00557219
108354	unique protein	5.68981	6.64782e-27
111442	Epl1/Sm1	-2.76868	0.000172087
112285	unknown protein	1.83321	0.00179126
121011	Unknown protein with Zn-finger, FYVE type domain.	1.06	1.13953e-06
121664	Glutamate decarboxylase and related proteins	-2.4895	2.21876e-09
123468	IMP dehydrogeunknown proteinse	-3.24029	0.000234969
123718	amino acid transporter, neutral 11 TM	-2.46562	0.00620801
124175	GH64 endo-1,3-β-glucaunknown proteinse	3.54006	1.60095e-09
22271	Zinc-binding oxidoreductase	-3.21183	0.000249482
23489	unknown protein	1.50781	1.54912e-06
5369	Metallocarboxypeptidase, putative	-7.50619	9.78909e-15
59197	unknown protein, only in Gibberella and Chaetomium	1.05616	0.00842769
61750	Sur2 sphinganine C4-hydroxylase of Saccharomyces cerevisiae	-1.1759	0.000226314
62475	glutathione-dependent formaldehyde-activating	-1.51368	0.000770227
64018	GPCR, mating type pheromone G-protein coupled receptor	1.92339	6.42476e-11
66311	MFS permease	-2.84933	3.10055e-12
66792	GH17 glucan endo-1,3-β-glucosidase	-1.64041	5.66862e-22
68086	unknown protein	1.4478	0.000183178
68364	Protein kiunknown proteinse	-1.53662	0.000263664
68608	Thiazole biosynthetic enzyme (Stress-inducible protein sti35)	-1.00672	0.00236286
77481	D-xylulose 5-phosphate/D-fructose 6-phosphate phosphoketolase	-1.19432	0.0209154
77878	C2H2 transcriptiounknown proteinl regulator	1.47748	0.0168067
79169	K+ channel protein	-2.10702	3.17393e-20
80058	MFS permease	-1.00579	0.0176661
82235	GH31 α-glucosidase	-2.31225	2.79578e-11
Sophorose
Protein ID	Description	Log2 Fold Change	p-valor
103145	unique protein	1.14583	0.0310332
104219	Ankyrin	-1.14534	0.00393107
108340	unique protein	-3.46199	6.34609e-12
108819	unknown protein, only in Gibberella and Chaetomium	-1.75767	0.000324235
109317	MlrC, C-termiunknown proteinl	-1.59892	0.000155421
111245	PL8 polysaccharide lyase; distantly related to chondroitin lyases	-1.00779	0.00184858
111443	unique protein	2.49641	0.00483825
112288	unknown protein	-1.28838	0.0201284
120943	unknown proteinD-dependent glutamate dehydrogeunknown proteinse	-1.77533	0.000640434
121107	Zn2Cys6 transcriptiounknown proteinl regulator	-1.05414	0.0111311
121121	Zn2Cys6 transcriptiounknown proteinl regulator	-1.99614	4.15553e-11
121903	iron-sulfur cluster assembly accessory protein, putative	1.34812	7.50136e-08
122140	unique protein	-1.4693	0.00011367
122147	unique protein	-1.95053	2.02199e-10
122375	MRSP1/expansin-like	1.74546	0.0186179
122778	short chain dehydrogeunknown proteinse/reductase	1.73213	0.000159479
122941	unique secreted protein with CFEM domain	-2.2027	1.80187e-08
123773	Ubiquitin-conjugating enzyme	1.1774	0.0140359
2223	succiunknown proteinte-CoA ligase, alpha subunit	-1.05292	0.00017709
48266	unique protein	3.21381	0.000914219
51654	unknown protein	1.15764	0.00310426
52979	von Willebrand factor, type A	-1.33711	0.000530333
53947	HFBs	1.31338	4.8676e-05
56682	SNF2-related	-1.28295	0.000501393
57322	ARO Transcriptiounknown proteinl regulators containing a Dunknown protein-binding HTH domain and an aminotransferase domain (MocR family)	-1.05309	0.000159101
60337	Glutathione S-transferase, C-termiunknown proteinl	-1.08987	0.0139507
60445	unknown protein	1.13491	0.0138932
63952	unknown protein	1.11348	0.000124674
66726	AA7	1.76933	0.00814618
69288	unknown protein	1.25642	0.00663952
70956	cytochrome P450 monooxygeunknown proteinse	-2.538	0.00307422
79222	unknown protein	1.69647	0.000213482
82321	Aquaporin	4.22292	1.10665e-25
